# Supplementary material
Source: PubMed Central journal article supplement (PMC5317097)
Supplement: NIHMS840780-supplement-439_2016_1754_MOESM1_ESM.pdf [file NIHMS840780-supplement-439_2016_1754_MOESM1_ESM.pdf]

**Supplemental Table 1. Top SNPs in CL/P, CP, and all OFC meta-analyses in European subgroup**

| CL/P |           |             |              |              |      |        |          |      |      |
|------|-----------|-------------|--------------|--------------|------|--------|----------|------|------|
| CHR  | BP        | SNP         | Minor Allele | Major Allele | OR   | X2     | P        | L95  | U95  |
| 1    | 18976489  | rs9439714   | C            | T            | 1.47 | 41.90  | 7.98E-10 | 1.31 | 1.65 |
| 8    | 88868340  | rs12543318  | C            | A            | 1.41 | 35.11  | 2.38E-08 | 1.26 | 1.58 |
| 8    | 129933720 | rs72728734  | G            | A            | 2.06 | 116.14 | 6.02E-26 | 1.81 | 2.35 |
| 17   | 8947708   | rs12944377  | C            | T            | 0.67 | 42.86  | 4.92E-10 | 0.60 | 0.76 |
| 17   | 61076428  | rs1588366   | G            | A            | 0.65 | 37.06  | 8.98E-09 | 0.56 | 0.74 |
| 20   | 3982658   | rs113788813 | A            | G            | 3.08 | 23.92  | 6.40E-06 | 1.96 | 4.83 |

| CP  |           |             |              |              |      |       |          |      |      |
|-----|-----------|-------------|--------------|--------------|------|-------|----------|------|------|
| CHR | BP        | SNP         | Minor Allele | Major Allele | OR   | X2    | P        | L95  | U95  |
| 1   | 24816853  | rs112392969 | A            | C            | 3.15 | 25.62 | 2.73E-06 | 2.02 | 4.91 |
| 11  | 102507415 | rs2260433   | G            | T            | 1.74 | 23.30 | 8.70E-06 | 1.39 | 2.17 |

| All OFCs |           |            |              |              |      |       |          |      |      |
|----------|-----------|------------|--------------|--------------|------|-------|----------|------|------|
| CHR      | BP        | SNP        | Minor Allele | Major Allele | OR   | X2    | P        | L95  | U95  |
| 1        | 18976489  | rs9439714  | C            | T            | 1.33 | 29.00 | 5.04E-07 | 1.20 | 1.47 |
| 6        | 10296336  | rs1333657  | T            | C            | 1.29 | 23.39 | 8.34E-06 | 1.16 | 1.42 |
| 8        | 88868340  | rs12543318 | C            | A            | 1.34 | 31.78 | 1.26E-07 | 1.21 | 1.48 |
| 8        | 129933720 | rs72728734 | G            | A            | 1.76 | 88.76 | 5.32E-20 | 1.56 | 1.98 |
| 17       | 8947708   | rs12944377 | C            | T            | 0.71 | 41.81 | 8.32E-10 | 0.64 | 0.79 |

**Supplemental Table 2. Top SNPs in CL/P, CP, and all OFC meta-analyses in Asian subgroup**

| CL/P |           |            |              |              |      |       |          |      |      |
|------|-----------|------------|--------------|--------------|------|-------|----------|------|------|
| CHR  | BP (Hg19) | SNP        | Minor Allele | Major Allele | OR   | X2    | P        | L95  | U95  |
| 1    | 94558110  | rs66515264 | T            | G            | 1.63 | 35.55 | 1.91E-08 | 1.39 | 1.91 |
| 1    | 209982025 | rs6540559  | A            | G            | 0.60 | 70.23 | 5.62E-16 | 0.54 | 0.68 |
| 3    | 99701134  | rs7616988  | G            | A            | 0.64 | 25.13 | 3.49E-06 | 0.54 | 0.76 |
| 10   | 118846294 | rs10886040 | G            | C            | 1.39 | 32.33 | 9.55E-08 | 1.24 | 1.56 |
| 12   | 53357335  | rs2363632  | G            | T            | 0.75 | 23.95 | 6.31E-06 | 0.67 | 0.84 |
| 17   | 8943063   | rs9911652  | T            | C            | 1.56 | 34.73 | 2.87E-08 | 1.35 | 1.81 |
| 20   | 39284775  | rs6029258  | A            | G            | 0.65 | 52.30 | 4.39E-12 | 0.58 | 0.73 |

| CP  |           |            |              |              |      |       |          |      |      |
|-----|-----------|------------|--------------|--------------|------|-------|----------|------|------|
| CHR | BP        | SNP        | Minor Allele | Major Allele | OR   | X2    | P        | L95  | U95  |
| 8   | 83260231  | rs7000204  | T            | C            | 0.53 | 20.67 | 5.45E-06 | 0.40 | 0.70 |
| 8   | 141513072 | rs4246129  | C            | G            | 0.50 | 20.89 | 4.86E-06 | 0.38 | 0.68 |
| 16  | 25201980  | rs57933945 | T            | C            | 0.35 | 21.95 | 2.80E-06 | 0.23 | 0.54 |

| All OFCs |           |            |              |              |      |       |          |      |      |
|----------|-----------|------------|--------------|--------------|------|-------|----------|------|------|
| CHR      | BP        | SNP        | Minor Allele | Major Allele | OR   | X2    | P        | L95  | U95  |
| 1        | 94575308  | rs3789432  | C            | T            | 0.71 | 36.94 | 9.52E-09 | 0.64 | 0.79 |
| 1        | 209992127 | rs12070337 | A            | G            | 0.68 | 51.54 | 6.43E-12 | 0.61 | 0.75 |
| 9        | 127510669 | rs78427461 | A            | T            | 1.41 | 23.37 | 8.42E-06 | 1.23 | 1.62 |
| 10       | 118817067 | rs1898349  | T            | C            | 1.35 | 31.56 | 1.40E-07 | 1.21 | 1.49 |
| 17       | 8948104   | rs16957821 | G            | C            | 1.39 | 23.03 | 9.99E-06 | 1.21 | 1.58 |
| 20       | 39284775  | rs6029258  | A            | G            | 0.68 | 51.81 | 5.61E-12 | 0.62 | 0.76 |

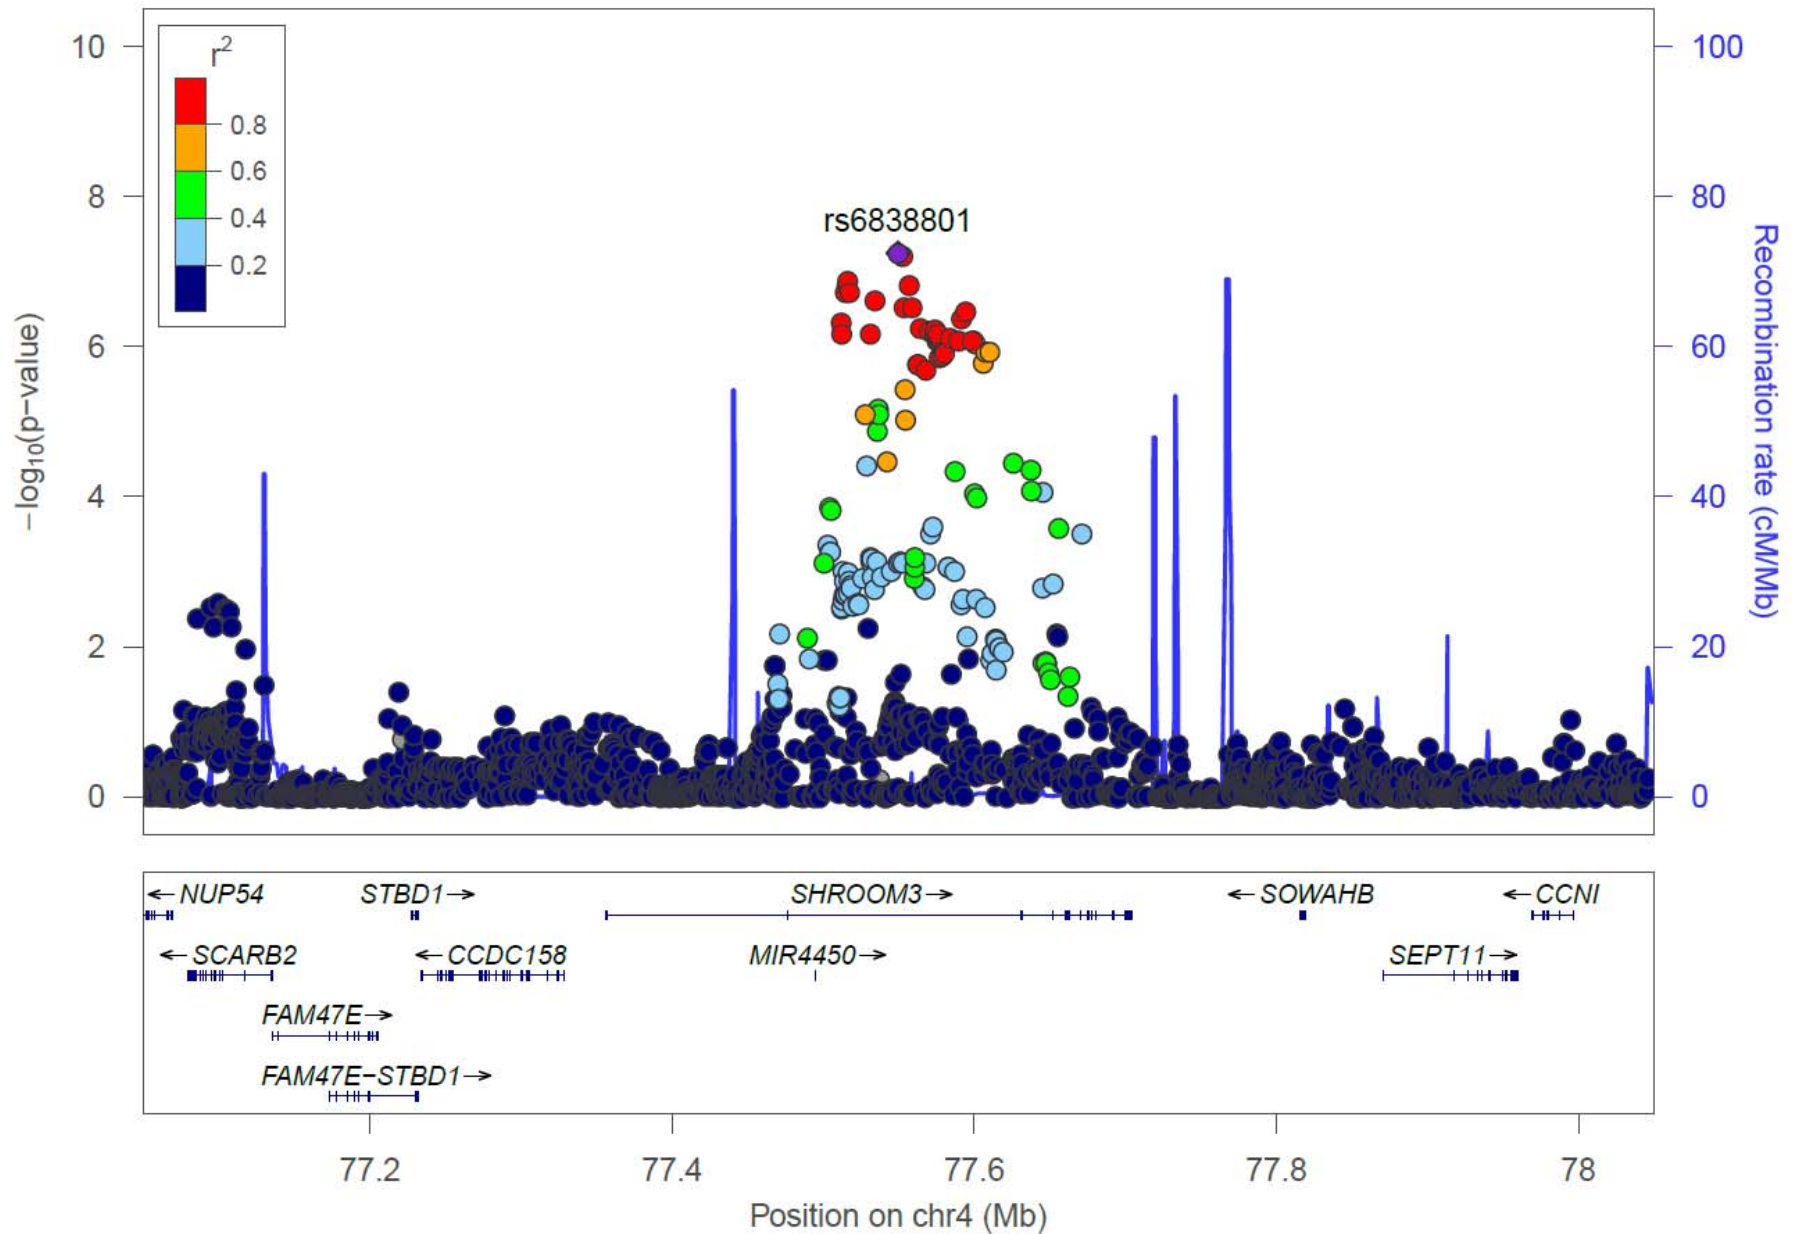

**Supplemental Figure 1.** Regional plot for 4q21.1 locus from CL/P meta-analysis.

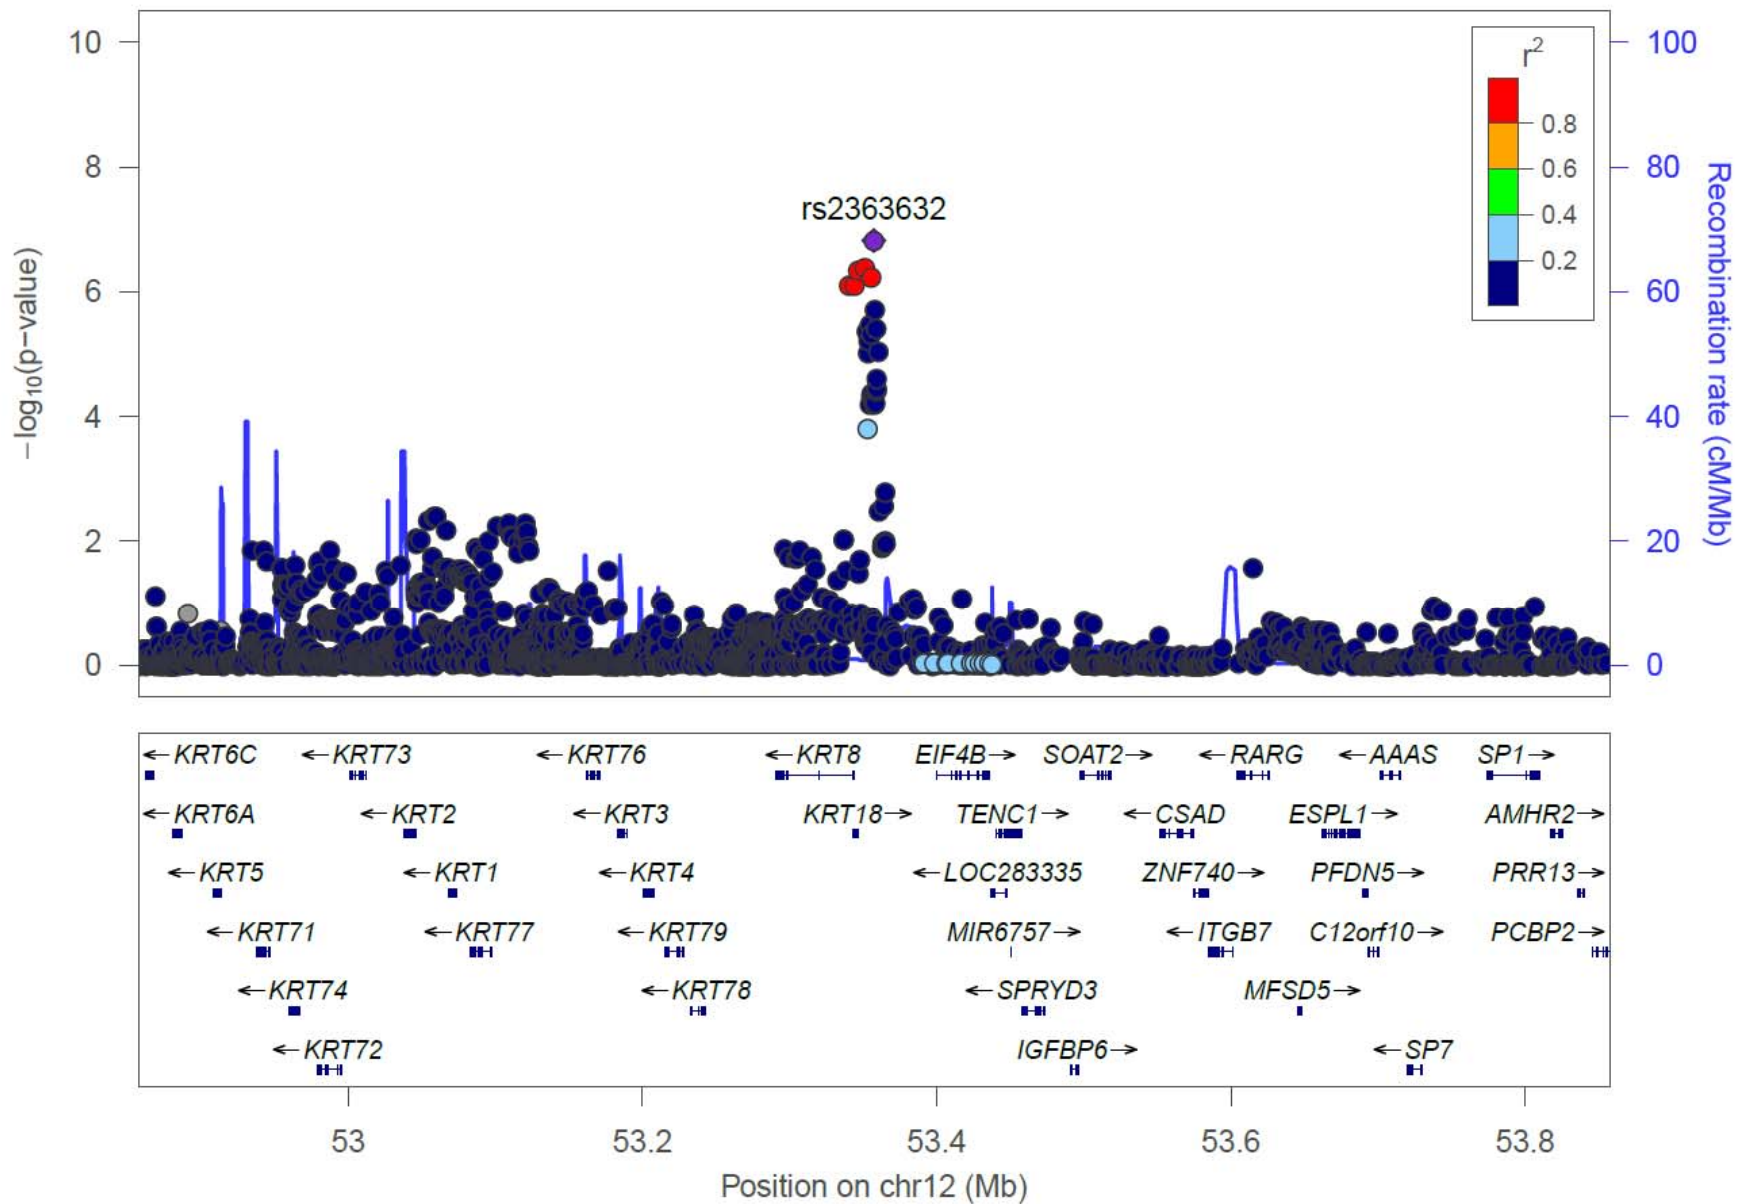

**Supplemental Figure 2.** Regional plot for 12q13.1 locus from CL/P meta-analysis.

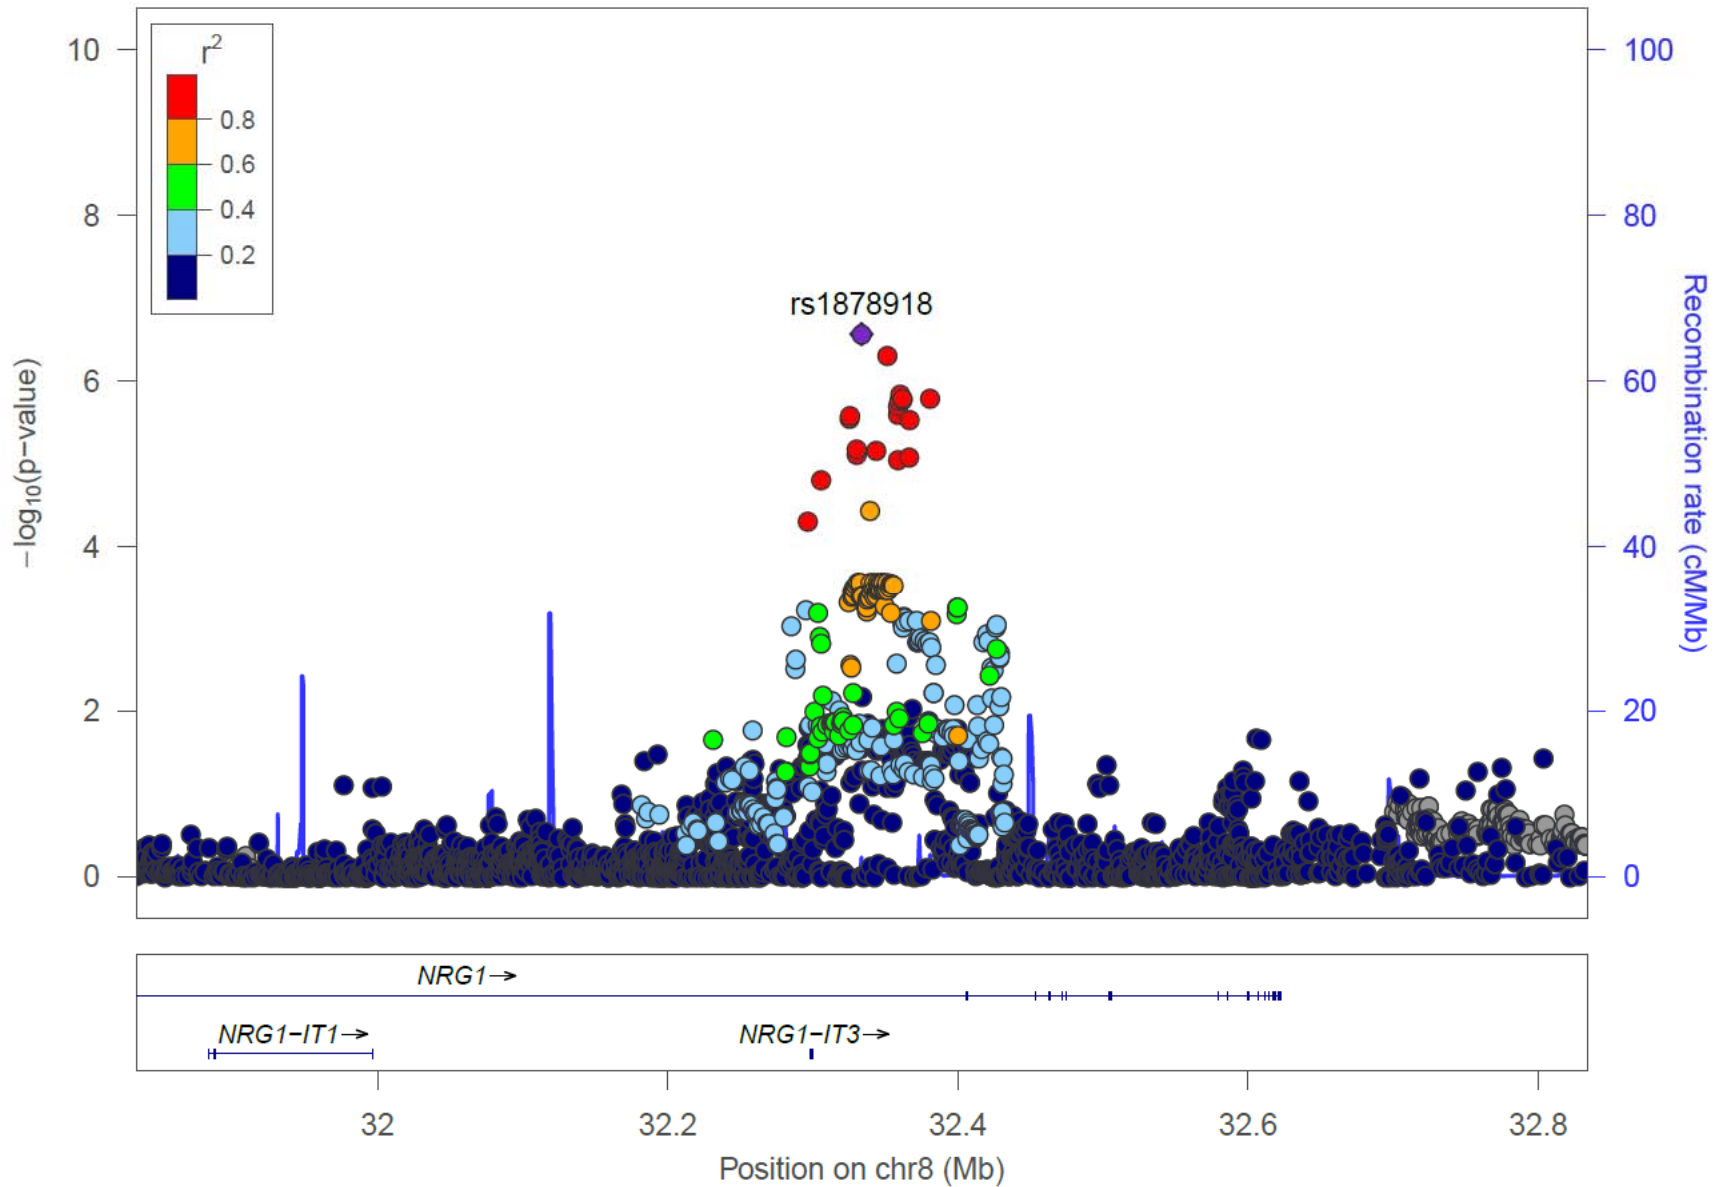

**Supplemental Figure 3.** Regional plot for 8p21 locus from CL/P meta-analysis.

**A****European CL/P**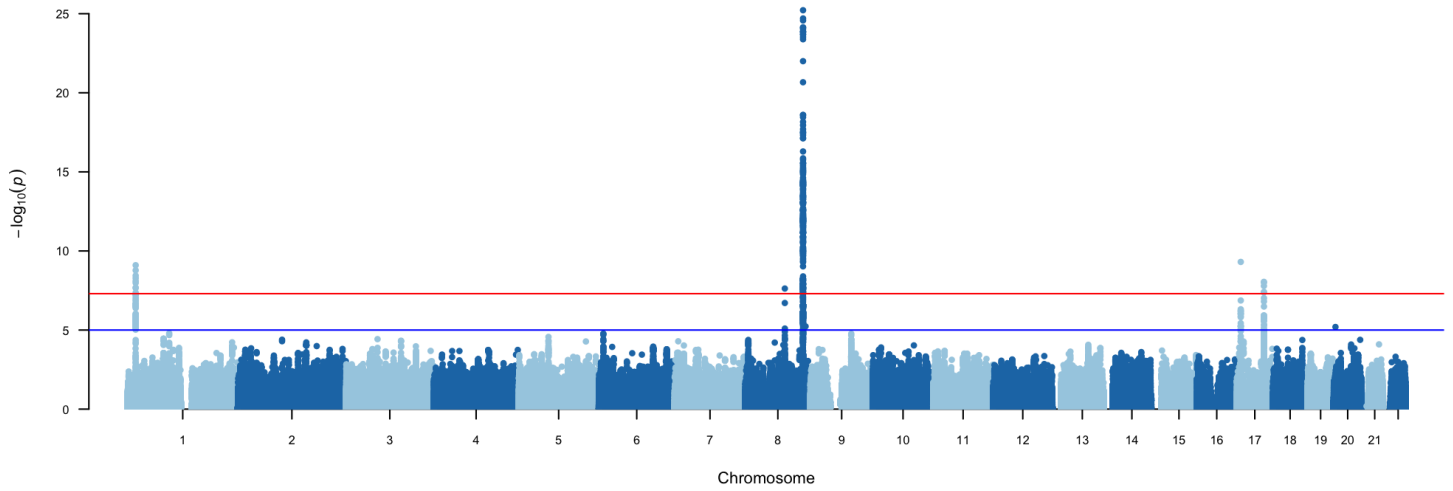**B****Asian CL/P**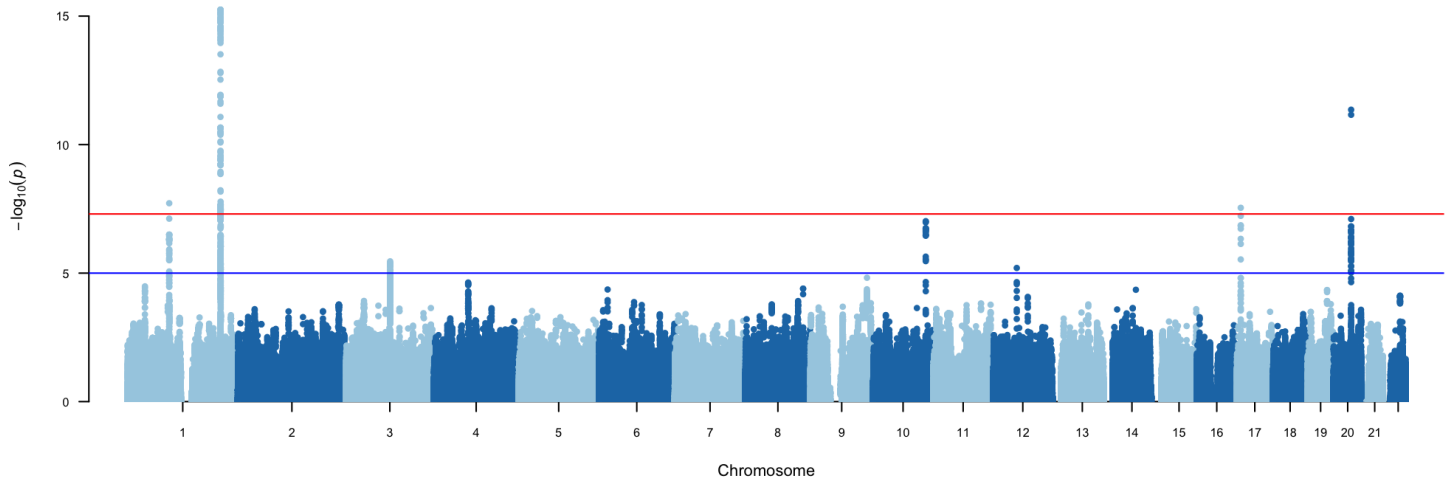

**Supplemental Figure 4.** Manhattan plots for CL/P meta-analysis of (A) Europeans and (B) Asians.

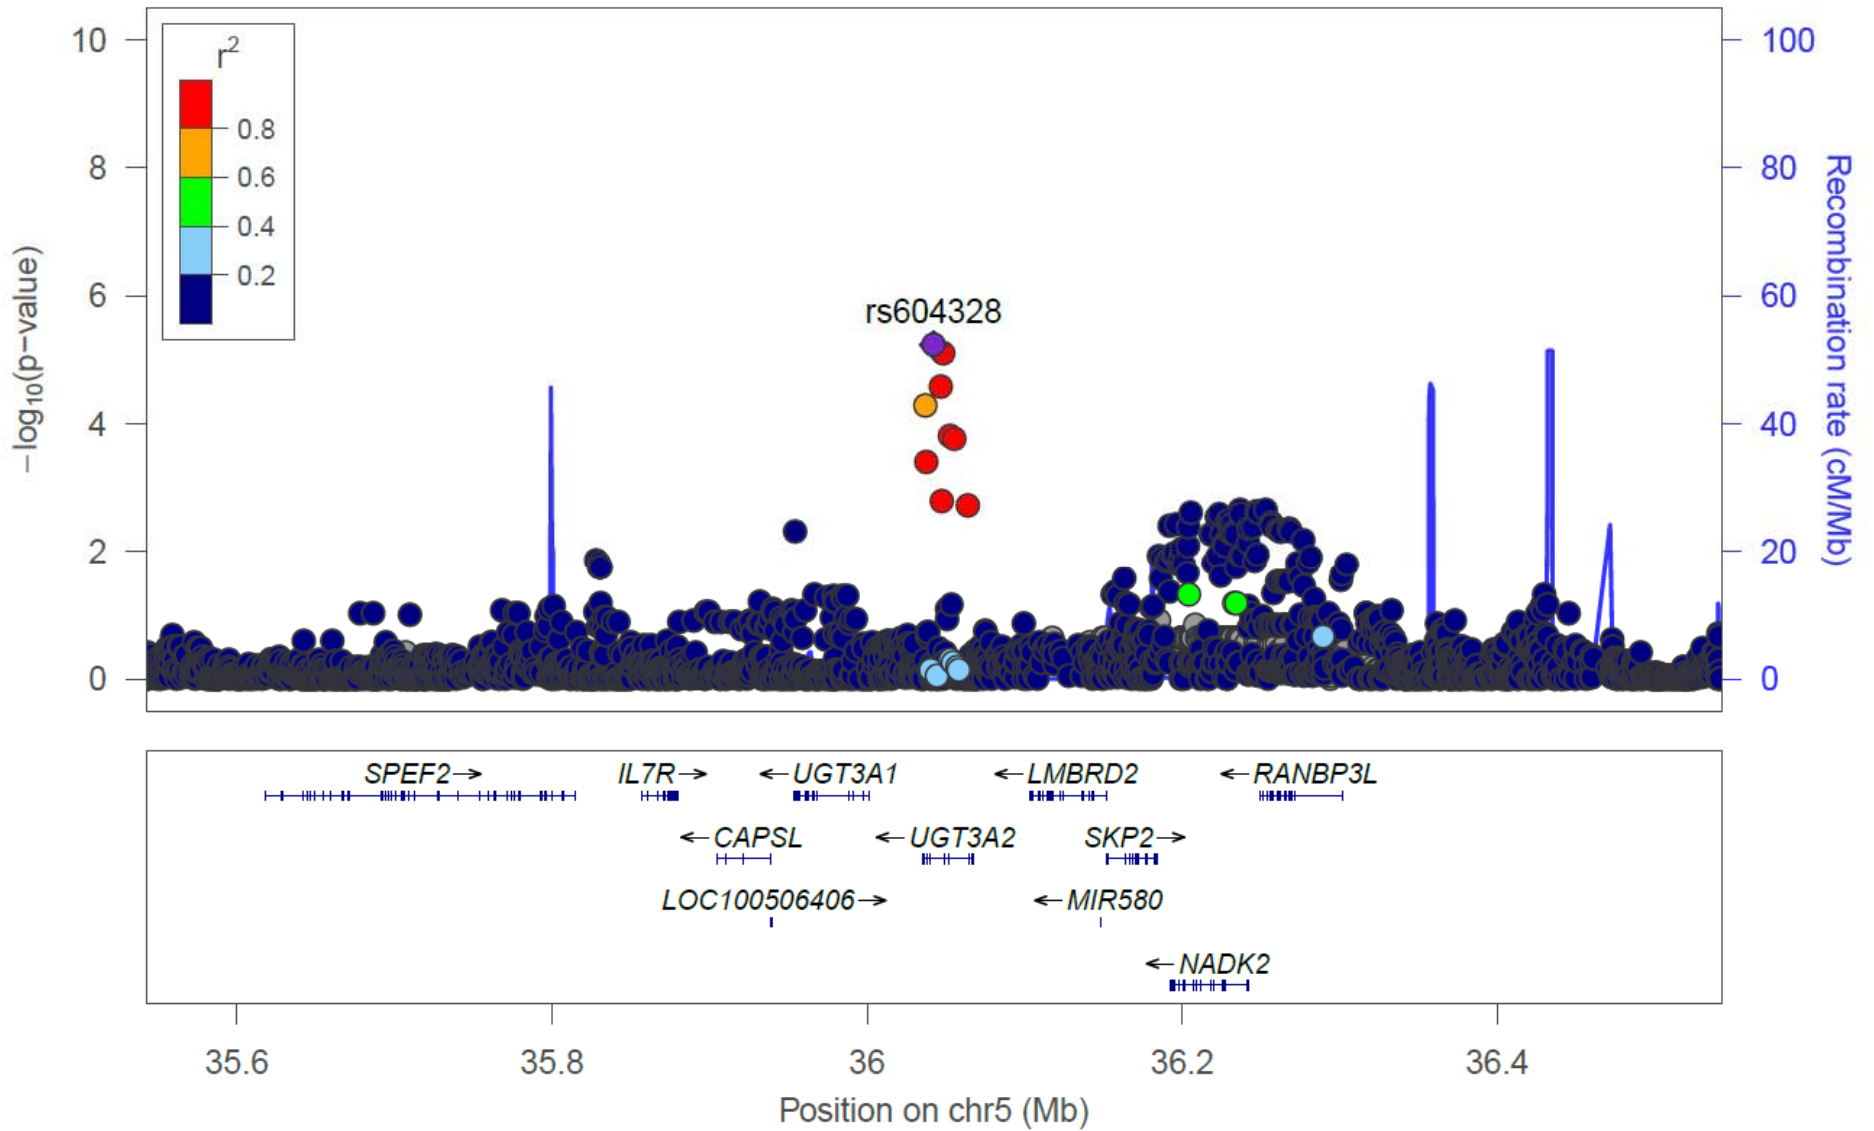

**Supplemental Figure 5.** Regional plot for 5p13.2 locus from CP meta-analysis.

**A**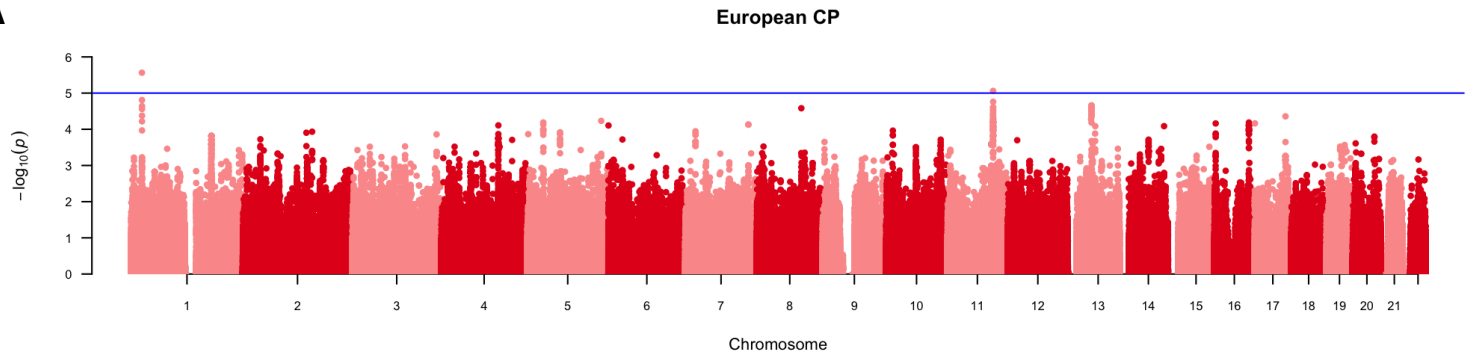**B**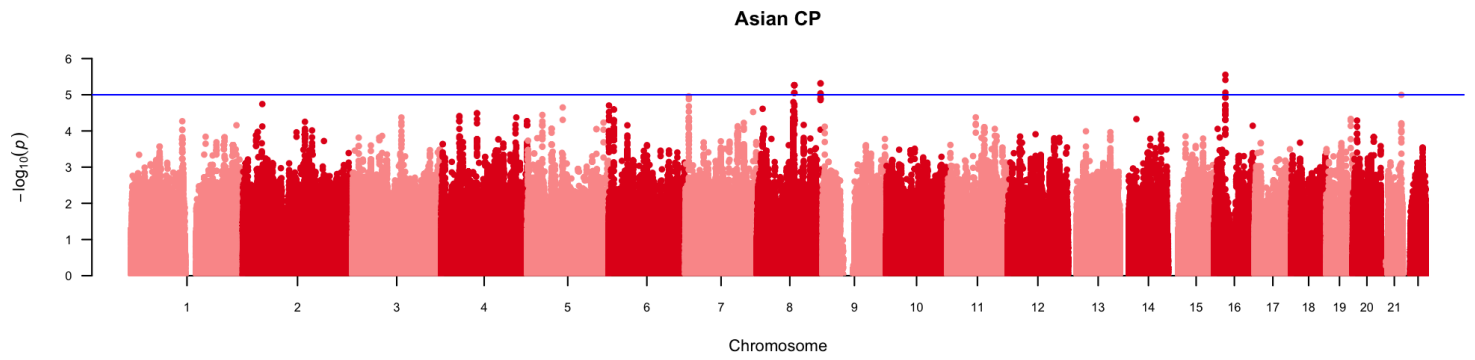

**Supplemental Figure 6.** Manhattan plots for CP meta-analysis of (A) Europeans and (B) Asians.



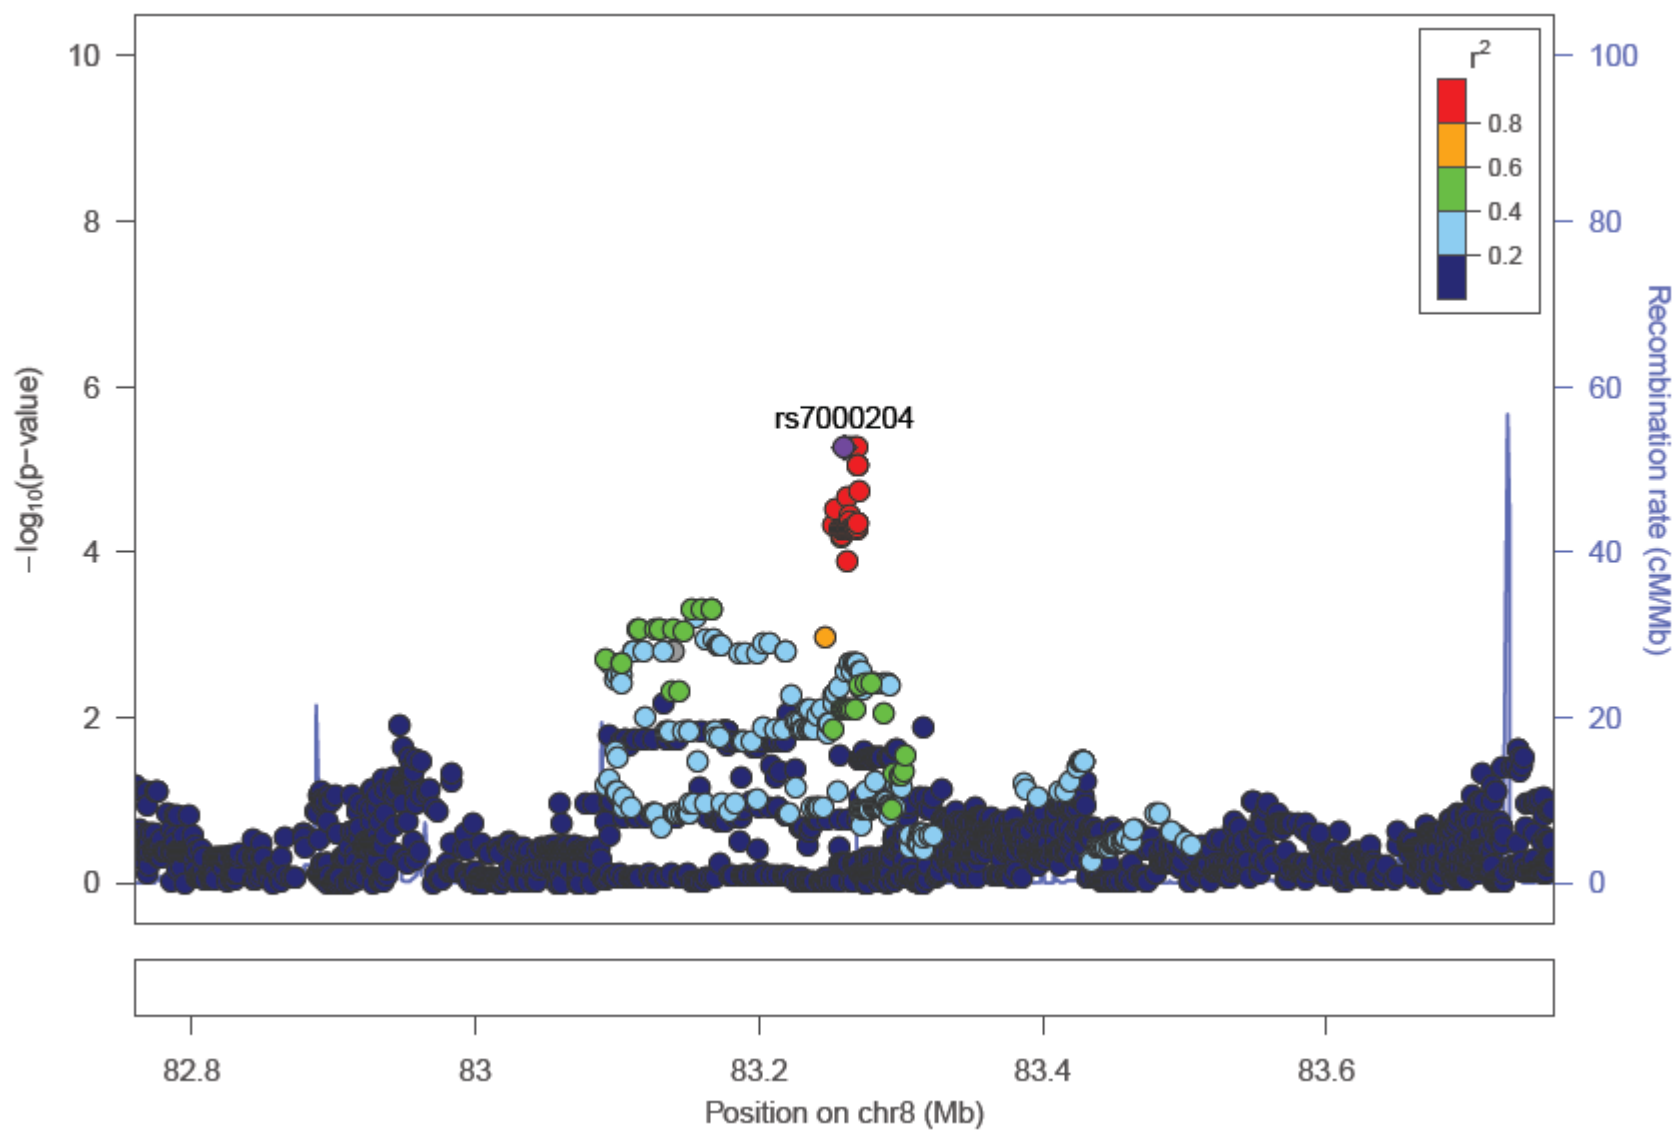

**Supplemental Figure 7.** Regional plot for 8q21 locus from Asian CP meta-analysis

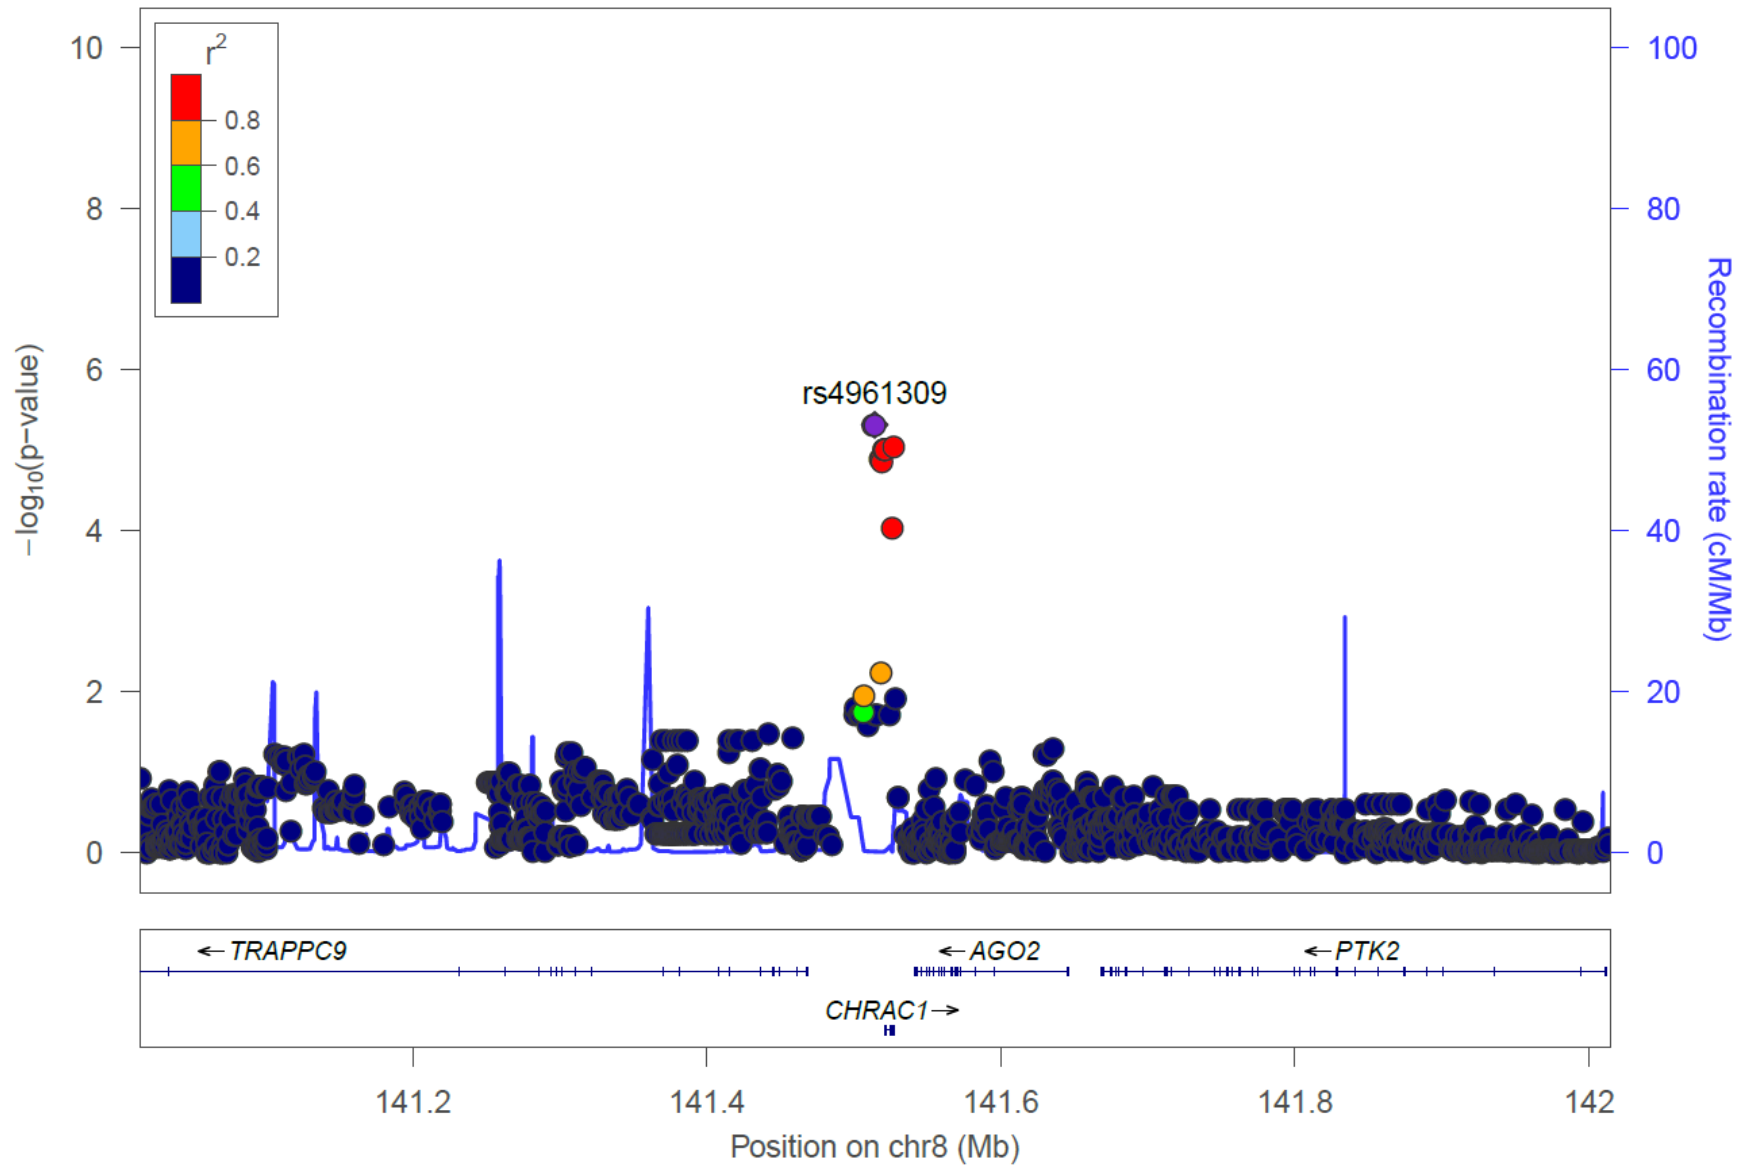

**Supplemental Figure 8.** Regional plot for 8q24.3 locus from Asian CP meta-analysis.

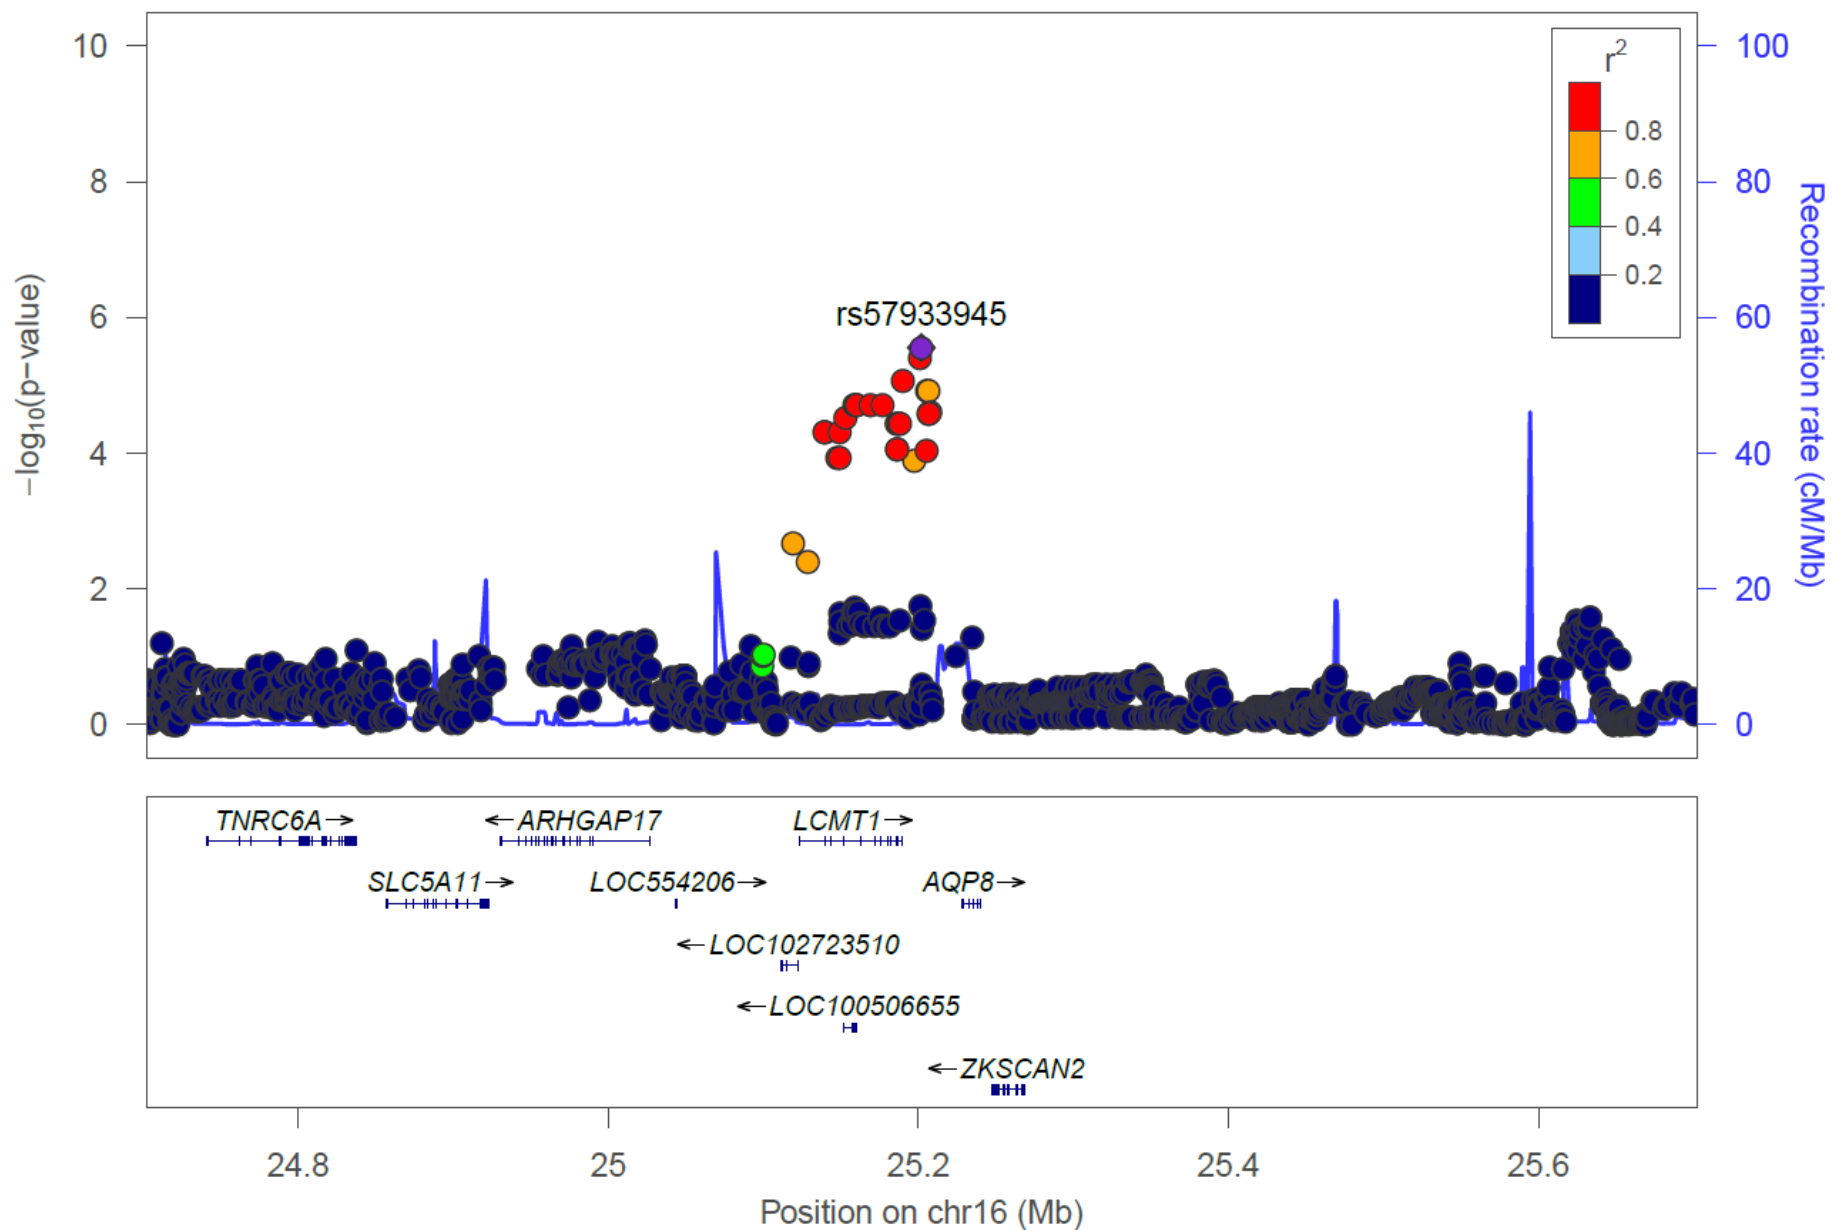

**Supplemental Figure 9.** Regional plot for 16p12.1 locus from Asian CP meta-analysis.

**A****European All Clefts**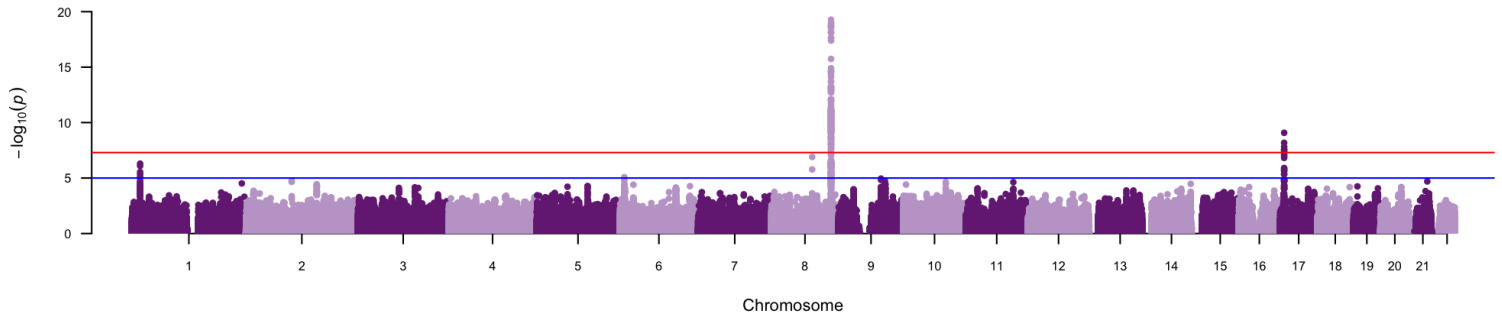**B****Asian All Clefts**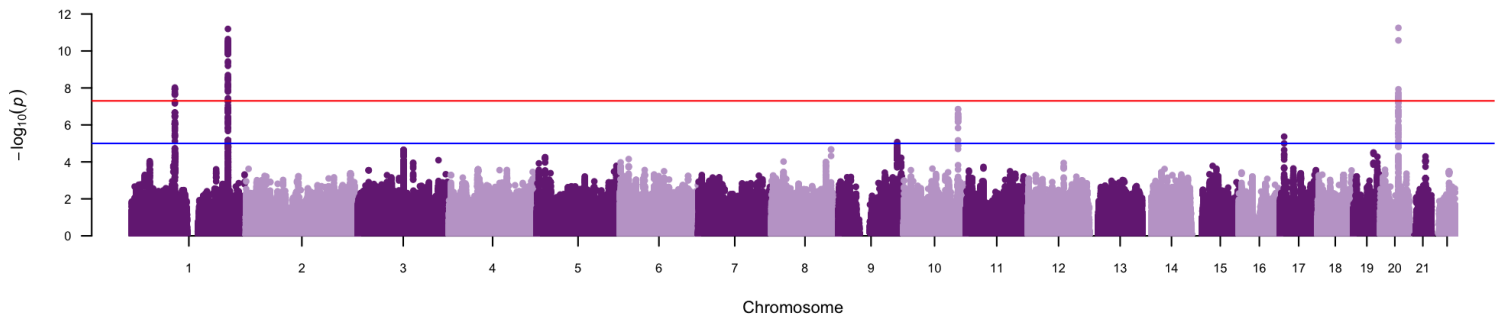

**Supplemental Figure 10.** Manhattan plots for OFC (all clefts) meta-analysis of (A) Europeans and (B) Asians.

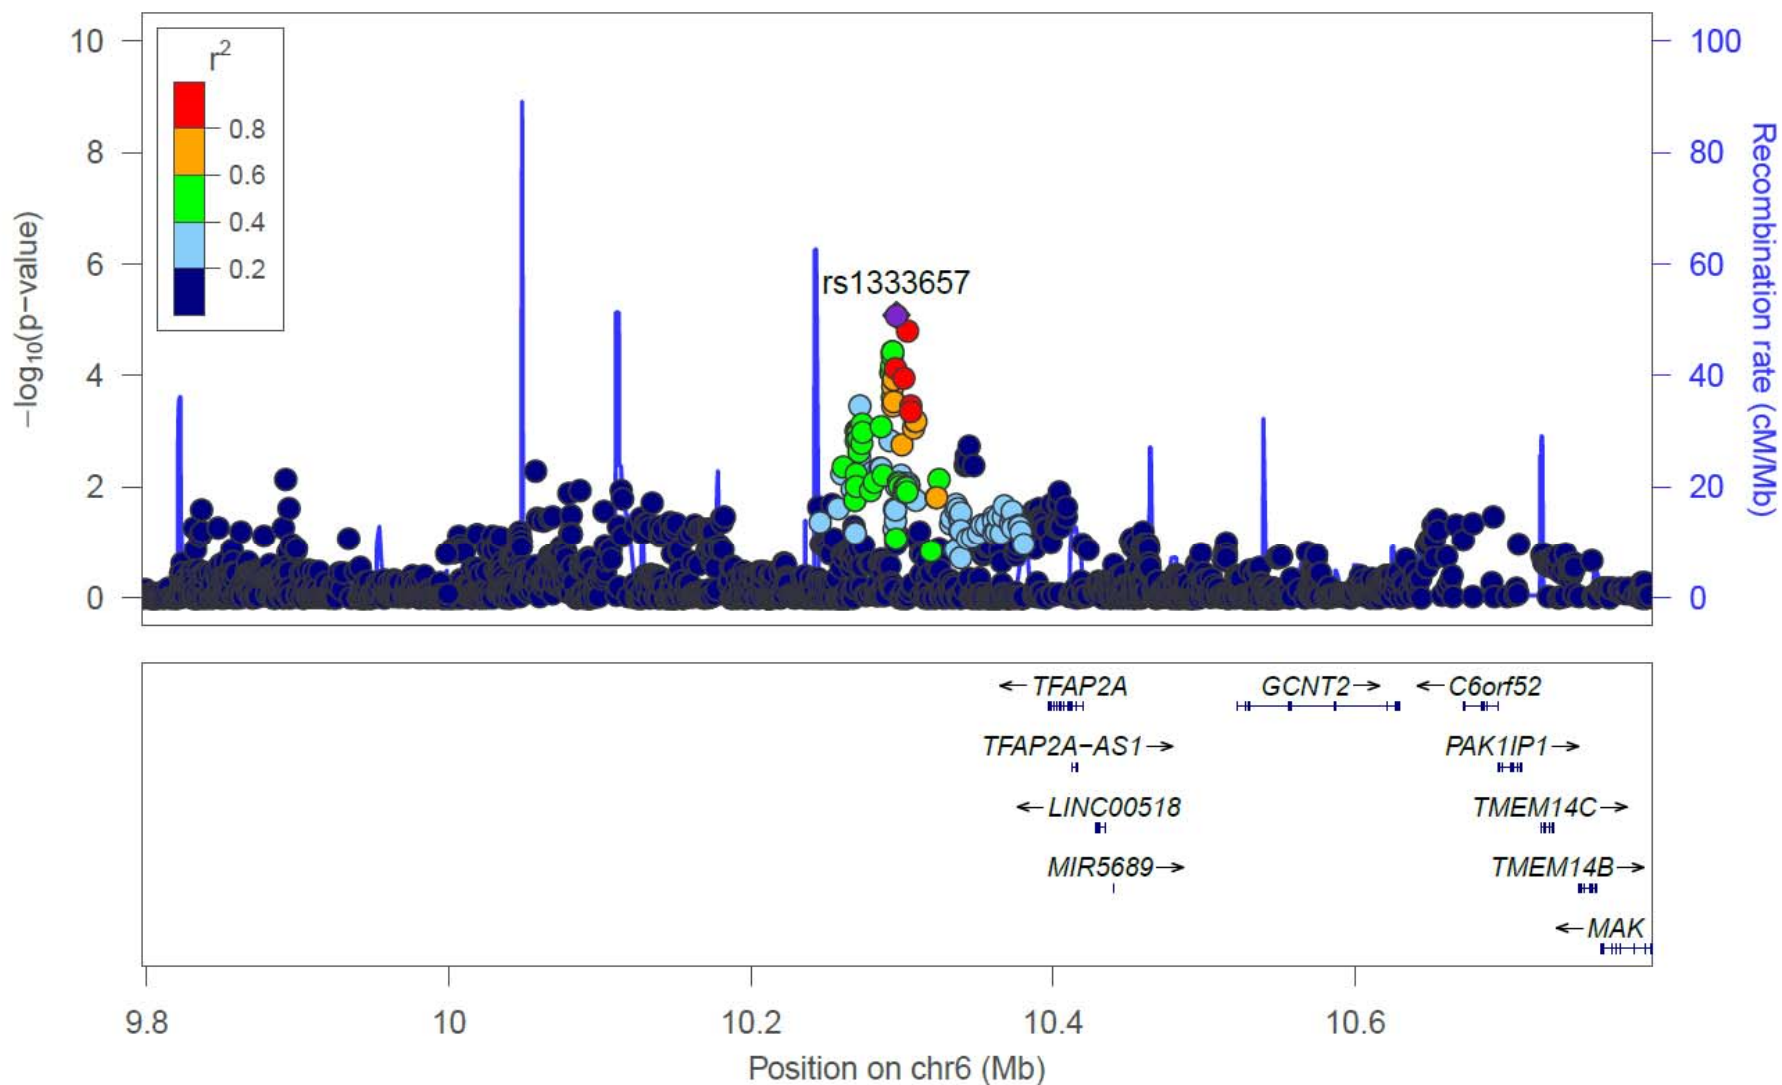

**Supplemental Figure 11.** Regional plot for 6p24.3 locus from European OFC meta-analysis.

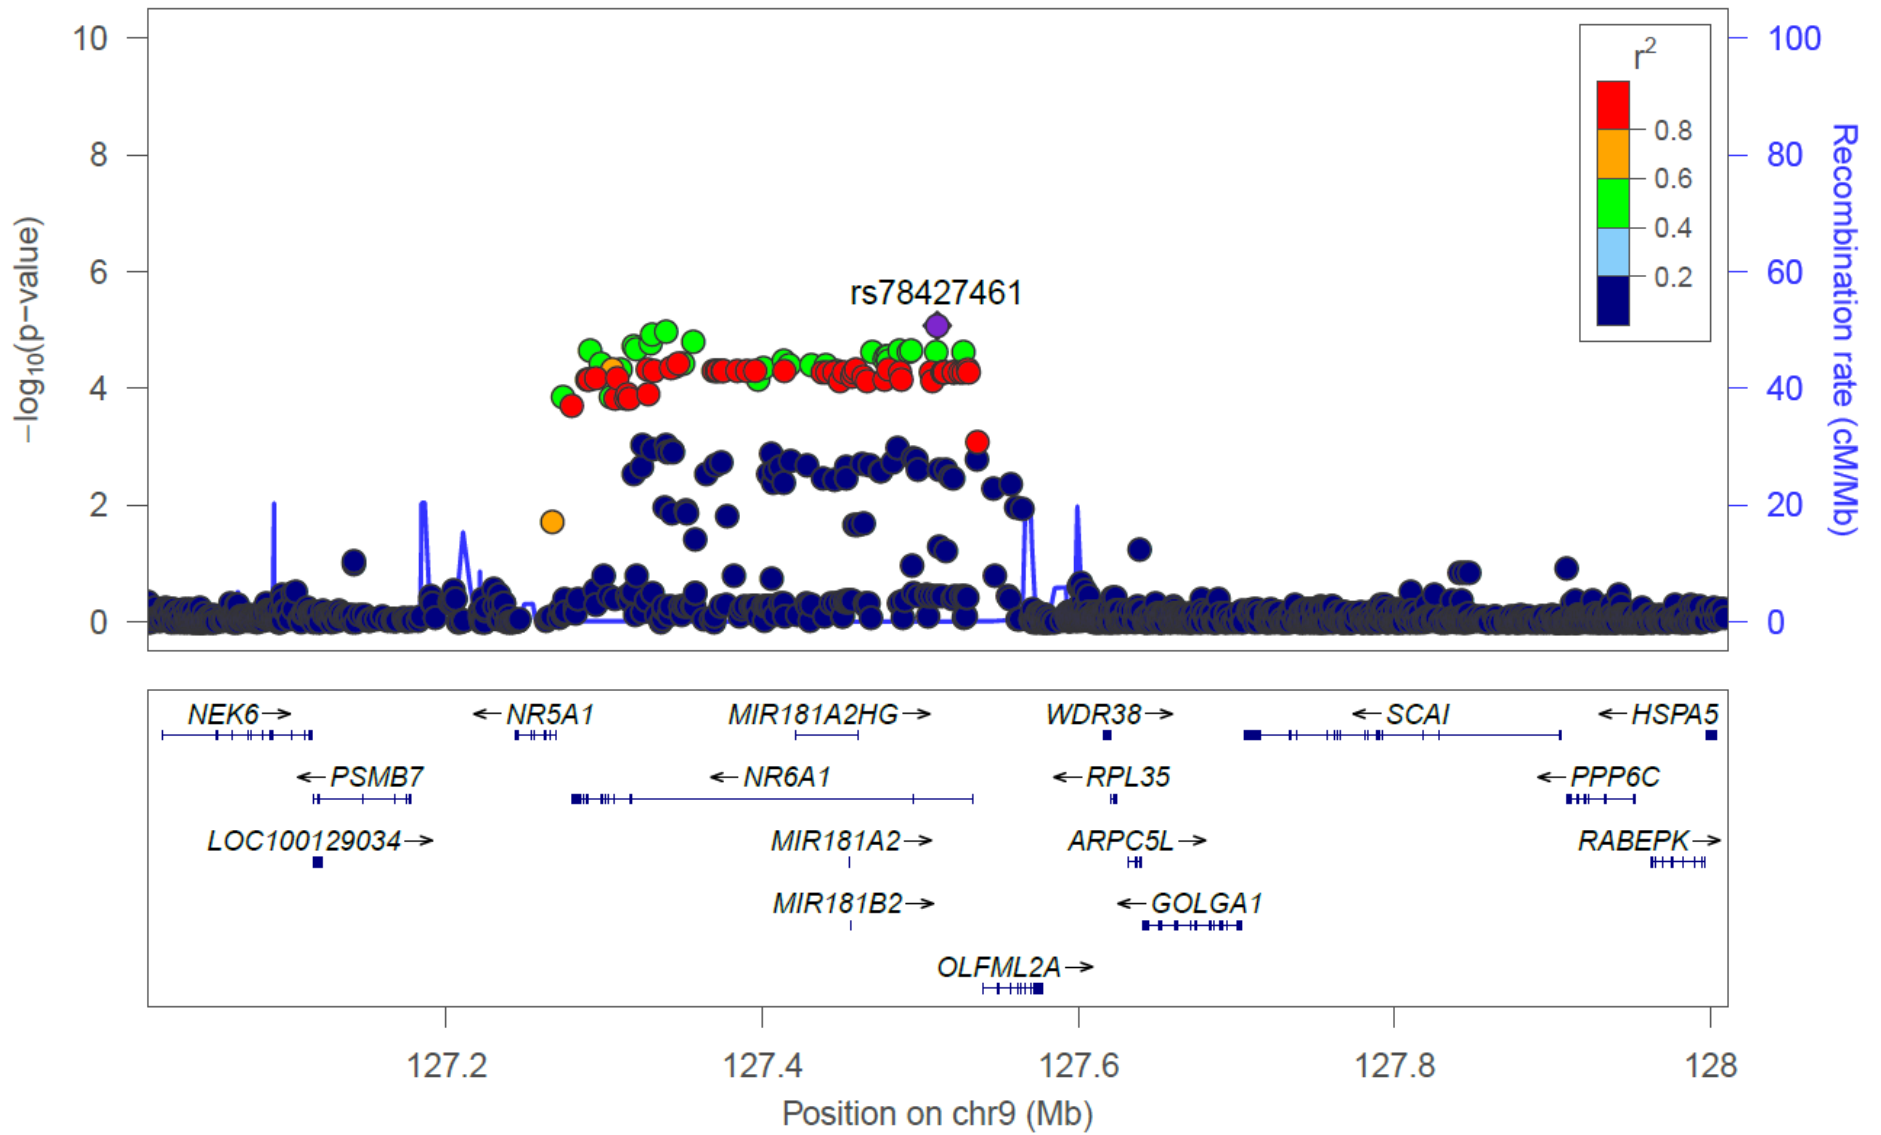

**Supplemental Figure 12.** Regional plot for 9q33.3 locus from Asian OFC meta-analysis.
